# Supplementary material for: Cut-like homeobox 1 (CUX1) tumor suppressor gene haploinsufficiency induces apoptosis evasion to sustain myeloid leukemia
Source: PubMed Central journal article supplement (PMC8087769; doi:10.1038/s41467-021-22750-8), 2021-04-30
Supplement: 41467_2021_22750_MOESM2_ESM.pdf [file 41467_2021_22750_MOESM2_ESM.pdf]

## Description of Additional Supplementary Files

### File: Supplementary Data 1

**Description:** Table showing Bayes Factors and residual scores from genome-wide CRISPR/Cas9 screens in *CUX1*-knockout and *CUX1*-wild-type U937 cells.

### File: Supplementary Data 2

**Description:** Table showing DAVID functional annotation of genes from CRISPR/Cas9 screen (Z score  $\geq 3.5$ ) that are potential genetic synthetic vulnerabilities in *CUX1*-knockout U937 cells.

### File: Supplementary Data 3

**Description:** List of differentially expressed genes in LSK cells from *Cux1<sup>+/-</sup>;Flt3<sup>ITD</sup>* versus *Flt3<sup>ITD</sup>* mice as determined by DESeq2 analysis. Genes with fold changes  $\geq 1.5$ ,  $P_{adj} \leq 0.05$  are shown.

### File: Supplementary Data 4

**Description:** Results of reverse phase protein array analysis of *CUX1*<sup>-/-</sup> (three clones, 1D, 1E and 2D) and wild-type (three clones, WT1-3) U937 cells. Normalized linear signal values for each protein are shown. *P* values were calculated using two-tailed, unpaired *t*-test and proteins with  $P \leq 0.05$  are shown. The ratio of mean *CUX1*-knockout (KO) to mean wild-type (WT) level for each protein is also shown.

### File: Supplementary Data 5

**Description:** Karyotype and fluorescence in-situ hybridization (FISH) characteristics of AML samples used in this study. FISH was used to detect common AML-associated copy number changes and translocations.

### File: Supplementary Data 6

**Description:** List of oligonucleotides used in this study.
